# Artificial Intelligence for context-aware surgical guidance in complex robot-assisted oncological procedures: an exploratory feasibility study

Fiona R. Kolbinger<sup>1,2,3,\*</sup>, Stefan Leger<sup>3,4,\*</sup>, Matthias Carstens<sup>1</sup>, Franziska M. Rinner<sup>1</sup>, Stefanie Krell<sup>4</sup>, Alexander Chernykh<sup>4</sup>, Thomas P. Nielen<sup>1</sup>, Sebastian Bodenstedt<sup>4</sup>, Thilo Welsch<sup>1,2</sup>, Johanna Kirchberg<sup>1,2</sup>, Johannes Fritzmann<sup>1,2</sup>, Jürgen Weitz<sup>1,2,3</sup>, Marius Distler<sup>1,2,§</sup>, and Stefanie Speidel<sup>3,4,§,✉</sup>

<sup>1</sup> Department of Visceral, Thoracic and Vascular Surgery, University Hospital and Faculty of Medicine Carl Gustav Carus, Technische Universität Dresden, Fetscherstraße 74, 01307 Dresden, Germany

<sup>2</sup> National Center for Tumor Diseases (NCT/UCC), Dresden, Germany: German Cancer Research Center (DKFZ), Heidelberg, Germany; Faculty of Medicine and University Hospital Carl Gustav Carus, Technische Universität Dresden, Dresden, Germany; Helmholtz-Zentrum Dresden - Rossendorf (HZDR), Fetscherstraße 74, 01307 Dresden, Germany

<sup>3</sup> Else Kröner Fresenius Center for Digital Health (EKFZ), Technische Universität Dresden, Fetscherstraße 74, 01307 Dresden, Germany

<sup>4</sup> Division of Translational Surgical Oncology, National Center for Tumor Diseases (NCT), Partner Site Dresden, Fetscherstraße 74, 01307 Dresden, Germany

\* These authors contributed equally

§ These authors jointly supervised this work

✉ Corresponding author: Prof. Dr. Stefanie Speidel, Division of Translational Surgical Oncology, National Center for Tumor Diseases (NCT/UCC), Partner Site Dresden, Fetscherstrasse 74, 01307 Dresden, Germany

☎ +49 (0) 351 5413

✉ stefanie.speidel@nct-dresden.de

## ABSTRACT

**Background:** Complex oncological procedures pose various surgical challenges including dissection in distinct tissue planes and preservation of vulnerable anatomical structures throughout different surgical phases. In rectal surgery, a violation of dissection planes increases the risk of local recurrence and autonomous nerve damage resulting in incontinence and sexual dysfunction. While deep learning-based identification of target structures has been described in basic laparoscopic procedures, feasibility of artificial intelligence-based guidance has not yet been investigated in complex abdominal surgery.

35 **Methods:** A dataset of 57 robot-assisted rectal resection (RARR) videos was split into a pre-  
36 training dataset of 24 temporally non-annotated videos and a training dataset of 33 temporally  
37 annotated videos. Based on phase annotations and pixel-wise annotations of randomly selected  
38 image frames, convolutional neural networks were trained to distinguish surgical phases and  
39 phase-specifically segment anatomical structures and tissue planes. To evaluate model  
40 performance, F1 score, Intersection-over-Union (IoU), precision, recall, and specificity were  
41 determined.

42 **Results:** We demonstrate that both temporal (average F1 score for surgical phase recognition:  
43 0.78) and spatial features of complex surgeries can be identified using machine learning-based  
44 image analysis. Based on analysis of a total of 8797 images with pixel-wise target structure  
45 segmentations, mean IoUs for segmentation of anatomical target structures range from 0.09 to  
46 0.82 and from 0.05 to 0.32 for dissection planes and dissection lines throughout different phases  
47 of RARR in our analysis.

48 **Conclusions:** Image-based recognition is a promising technique for surgical guidance in complex  
49 surgical procedures. Future research should investigate clinical applicability, usability, and  
50 therapeutic impact of a respective guidance system.

51

## 52 INTRODUCTION

53 Despite advances in nonsurgical management of rectal cancer, the vast majority of curative  
54 treatment approaches require oncologically radical surgical removal of the primary tumor and  
55 locoregional lymph nodes within the mesorectal envelope (total mesorectal excision, TME). This  
56 surgical step requires delicate preparation along the mesorectal fascia to ensure complete  
57 resection and minimize the risk of local tumor recurrence.<sup>1</sup> In parallel, autonomous nerves running  
58 in close proximity to the resection area must be protected to avoid postoperative incontinence and  
59 sexual dysfunction. With highly varying numbers depending on surgeon expertise and center  
60 volume, these functional sequelae affect up to 85% of patients after oncological rectal resection  
61 and can be a direct result of suboptimal surgical preparation outside of anatomical planes, leading  
62 to nerve injury.<sup>2,3</sup>

63 Surgical robots offer mechanical enhancements such as improved instrument dexterity, hand-eye  
64 coordination, and a three-dimensional view, however, no robust clinical benefit over conventional  
65 laparoscopic surgery could be demonstrated to date.<sup>4</sup> Based on the hypothesis that an integration  
66 of context-dependent surgical guidance into minimally-invasive surgical systems could markedly  
67 improve surgical quality and outcome and diminish quality variation between surgeons, extensive  
68 research on the development of image recognition algorithms has been conducted in recent years  
69 using laparoscopic imaging data. Most of these endeavors, however, have focused on tasks with  
70 indirect surgical benefit, such as automated instrument detection.<sup>5,6</sup> Thus far, translational Artificial  
71 Intelligence (AI)-based success stories in the field of surgery are lacking and clinical applications  
72 are mostly limited to orthopedic, neurosurgical, and hepatic surgical procedures.<sup>7,8</sup> With regard to  
73 approaches with high translational potential in laparoscopic surgery, deep learning-based  
74 algorithms have recently been shown to identify relevant anatomical areas during  
75 cholecystectomy.<sup>9,10</sup> Of note, such methods have only been established for less complex surgical  
76 procedures, for which – in part – open-access datasets exist for the purpose of algorithm  
77 development and validation.<sup>11,12</sup> In these operations, however, the benefit of AI-based assistance  
78 is marginal.

79 In this project, we aim to explore the potential of deep learning-based detection algorithms based  
80 on convolutional neural networks (CNNs) to provide context-dependent guidance in highly  
81 complex oncological procedures. Considering the example of robot-assisted rectal resection  
82 (RARR), we created a dataset of spatio-temporal data in the form of temporally annotated surgery  
83 videos and semantically segmented video frames. Based on this data, we trained different CNNs  
84 to automatically detect surgical phases and identify a variety of visually delineable anatomical  
85 structures and dissection planes to enable context-aware surgical guidance.

86 Our findings suggest that surgical phase differentiation and recognition of selected anatomical  
87 structures including the mesocolon, the mesorectum, Gerota's fascia, or the abdominal wall, can  
88 satisfactorily be implemented in complex minimally-invasive surgical procedures. We thereby  
89 establish essential components of a clinically applicable AI-based system for context-aware  
90 guidance in complex minimally-invasive oncological surgery. On a general level, this work  
91 highlights challenges in the implementation of clinically relevant surgical guidance functions, in  
92 particular limited data availability, and encourages inter-institutional collaboration and improved  
93 data accessibility to facilitate data science-based approaches in a diverse range of surgical  
94 procedures with varying complexity.  
95

## 96 **METHODS**

### 97 ***Patient population and dataset***

98 Between February 2019 and January 2021, video data from a total of 57 robot-assisted anterior  
99 rectal resections, intersphincteric resections, or abdominoperineal resections with either partial  
100 (PME) or TME performed at the University Hospital Carl Gustav Carus Dresden, Germany were  
101 collected. All included patients had a clinical indication for the surgical procedure, recommended  
102 by an interdisciplinary tumor board. All procedures were performed using the da Vinci® Xi system  
103 (Intuitive Surgical, Sunnyvale, CA, USA). Surgeries were recorded using the CAST system  
104 (Orpheus Medical GmbH, Frankfurt a.M., Germany). Each record was saved at a resolution of  
105 1920 x 1080 pixels in MPEG-4 format.

106 This study was performed in accord with the ethical standards of the Helsinki declaration and its  
107 later amendments. The local Institutional Review Board (ethics committee at the Technical  
108 University Dresden) reviewed and approved this study (approval number: BO-EK-137042018).  
109 Written informed consent was obtained from all participants. The trial was registered on  
110 clinicaltrials.gov (trial registration ID: NCT05268432).

111

### 112 ***Annotations***

113 The total dataset of 57 RARR recordings was randomly split into a pre-training dataset (24  
114 temporally non-annotated videos) and an annotated training dataset (33 videos). Annotations  
115 were performed by two members of the research team (MC, FMR) after thorough education and  
116 several rounds of training annotations with two experts in robot-assisted rectal surgery (JW, MD),  
117 and reviewed by a surgeon in training with considerable experience in robot-assisted rectal  
118 surgery (FRK). According to a previously created annotation protocol (Supplementary Material 1),  
119 the surgical process was temporally annotated using `com *Surgery Workflow Toolbox*`  
120 [Annotate] version 2.2.0 (`com, Cesson-Sévigné, France`) with regard to the sequence of  
121 surgical phases (Figure 1). The definition and order of the five phases – preparation and  
122 intraabdominal orientation, medial mobilization of descending colon, lateral mobilization of  
123 descending colon, mesorectal excision, and extraabdominal preparation – was based on  
124 institutional standards and international recommendations for RARR.<sup>13,14</sup> Of note, splenic flexure  
125 and descending colon mobilization was carried out from medial to lateral as described previously  
126 by Ahmed *et al.*<sup>13</sup>.

127 For training and validation of phase-specific semantic segmentation algorithms, equidistant  
128 frames from at least ten selected video recordings were annotated per phase with regard to

129 visibility of anatomical structures and dissection planes (Figure 1, Supplementary Table 1) using  
130 the open-source software 3D Slicer with the SlicerRT program extension.<sup>15</sup> The videos for each  
131 phase were selected based on criteria of target structure visibility and exposition (Supplementary  
132 Table 1).

133

#### 134 ***Model development and evaluation: Phase detection***

135 For surgical phase recognition a long short-term memory network (LSTM)<sup>16</sup> that learns the  
136 temporal relationships combined with a residual neural network (ResNet)<sup>17</sup> as feature extractor  
137 was trained based on the 33 annotated RARR videos to detect the five surgical phases  
138 (preparation, medial mobilization of descending colon, lateral mobilization of descending colon,  
139 (total) mesorectal excision, and extraabdominal preparation) (Figure 2 A).

140 The pre-training of the feature extractor was performed in two different configurations: (a) the  
141 ResNet was pre-trained on the ImageNet database<sup>18</sup> only and (b) the pre-trained feature extractor  
142 was fine-tuned on 24 temporally non-annotated RARR videos using self-supervised training.  
143 Subsequently, the two different models were trained and evaluated using a 4-fold cross validation  
144 scheme. For this purpose, the training folds were again divided into a training and validation (four  
145 randomly chosen surgeries) set to select the final model based on the network accuracy and to  
146 improve the generalizability of the network. Afterwards, the final model was assessed on the test  
147 folds and the performance was measured by the F1 score and the accuracy.

148

#### 149 ***Model development and evaluation: Semantic segmentation***

150 For each surgery phase, a separate convolutional neural network was trained for the phase-  
151 specific segmentation of anatomical structures and tissue planes (Figure 2 B). For this purpose,  
152 the Detectron2<sup>19</sup> framework was used in combination with a ResNet and a feature pyramid  
153 network as backbone, which was pre-trained on the ImageNet dataset<sup>18</sup>. The model was trained  
154 and evaluated within a leave-one-out cross validation scheme. To improve the generalization and  
155 the stability of the segmentation network the training fold was split randomly into a training and a  
156 validation fold at a ratio of 80:20. Subsequently, the trained model was assessed on the validation  
157 fold every 5000 training iterations using the average Intersection-over-Union (IoU) to select the  
158 final model. Finally, the average segmentation performance was assessed using F1 score, IoU,  
159 precision, recall, and specificity on the test folds.<sup>20</sup> These parameters are commonly used  
160 technical measures of prediction exactness, ranging from 0 (least exact prediction) to 1 (entirely  
161 correct prediction without any misprediction).

## 162 **Statistics and Reproducibility**

163 In total, recorded surgery videos from 57 surgeries were considered in this analysis. For surgical  
164 phase recognition, these data were randomly split into a non-annotated pre-training dataset (24  
165 videos) and a temporally annotated training and test dataset (33 videos). For training of the  
166 segmentation algorithms for each individual phase, at least ten video recordings were selected  
167 per phase with regard to visibility of anatomical structures and dissection planes and annotated  
168 as described above.

169 Training of phase detection and segmentation networks were carried out as follows: The  
170 ResNet50 described by He et al.<sup>17</sup> was selected as image feature extractor, having demonstrated  
171 a high performance on the Cholec80 dataset<sup>21</sup>. For the specific detection task, the last layer was  
172 replaced by a layer representing the five surgical phases. Afterwards, the network was trained  
173 frame-wise with the label information of the current phase. To enhance the robustness of the  
174 model, data augmentation consisting of image rotation, image flipping and image noise was used.  
175 Furthermore, the network was trained for 30 epochs, where each epoch consists of 3000 random  
176 chosen batches with a size of 64. As optimizer, Adam with an initial learning rate of 0.0001 was  
177 used and the weighted cross entropy loss was applied to handle the class-imbalanced problem.  
178 The self-supervised learning approach described by Funke et al.<sup>22</sup> was adapted, so that a  
179 ResNet50 was trained based on temporally coherent video frame embedding using the 1st and  
180 2nd order contrastive loss.<sup>23,24</sup>

181 The segmentation network was trained for 200 epochs and a batch size of 2. The data  
182 augmentation consisting of image resizing and random flipping of the image was used to enhance  
183 the training process. For the optimization of the network the gradient descent optimization  
184 algorithm was used with a learning rate of 0.0002.

## 185 RESULTS

### 186 ***Dataset***

187 A total of 57 RARR with an average duration of  $414 \pm 112$  minutes performed by nine experts in  
188 robot-assisted oncological surgery were recorded and analyzed within this study. The majority of  
189 patients ( $n = 43$ , 75.4%) were male and the predominant indication for the surgical procedure was  
190 colorectal cancer ( $n = 54$ , 94.7%). Twenty-five patients (43.9%) had undergone neoadjuvant  
191 irradiation to the surgical field. Overall, the sample represents a wide variety of rectal cancer  
192 manifestations, including a considerable number of patients ( $n = 27$ , 47.4%) with locally advanced  
193 tumors (Table 1).

194 Thirty-three videos were temporally annotated with regard to the sequence of five standardized  
195 surgical phases (Figure 1). For semantic segmentation, individual models were trained for each  
196 surgical phase to phase-specifically identify distinct target structures. Based on the visibility of  
197 these target structures (Supplementary Table 1), at least ten videos were selected from the  
198 available video dataset for training of the algorithm for the respective surgical phase. In total, 8797  
199 annotated frames were used for training of the semantic segmentation algorithms (Figure 3,  
200 Supplementary Table 2).

201

### 202 ***Model performance: Surgical phase recognition***

203 The sequence of the five surgical phases (Figure 1) was recognized using a ResNet50  
204 architecture for recognition of visual features with or without a long-short-term memory (LSTM)  
205 network for extraction of temporal features (Figure 2 A). Using the ResNet50 alone, surgical  
206 phases were predicted at an average accuracy of  $0.74 \pm 0.02$  and an F1 score of  $0.68 \pm 0.01$  both  
207 with and without pre-training with non-annotated RARR videos. Paired with an LSTM, the accuracy  
208 for surgical phase prediction was  $0.82 \pm 0.01$ . As for the ResNet50 alone, self-supervised pre-  
209 training of the network did not result in any improvement of the prediction (accuracy:  $0.83 \pm 0.02$ )  
210 by the combined ResNet50 and the LSTM (Table 2).

211

### 212 ***Model performance: Segmentation of anatomical structures and dissection planes***

213 Anatomical structures and dissection planes were localized using a multi-layer convolutional  
214 neural network (Figure 2 B). Table 3 displays mean F1 score, IoU, precision, recall, and specificity  
215 for individual segments predicted by the trained phase-specific algorithms.



216 Overall, the most reliable detections were achieved for Gerota's fascia (F1 score:  $0.78 \pm 0.05$ ) and  
217 the mesocolon (F1 score:  $0.71 \pm 0.07$ ) during medial mobilization of the descending colon and for  
218 the abdominal wall (F1 score:  $0.82 \pm 0.06$ ) and fatty tissue (F1 score:  $0.68 \pm 0.11$ ) during lateral  
219 mobilization of the descending colon. The dissection plane ("angel's hair") in the Mesorectal  
220 Excision phase could be predicted with an F1 score of  $0.32 \pm 0.09$ , whereas prediction of the exact  
221 dissection line was largely unsuccessful at an F1 score of  $0.05 \pm 0.02$  both during medial  
222 mobilization of the descending colon and during Mesorectal Excision (Table 3). Figure 3 illustrates  
223 examples of semantic segmentations by the developed CNNs, which were trained for each phase  
224 of the procedure.

225 The target structures varied considerably with regard to the proportion of images without any  
226 prediction, resulting in a value of "0" for the analyzed metrics (Figure 4). For instance, Gerota's  
227 fascia and the mesocolon were correctly identified in most of the respective images, while  
228 dissection lines, vessel structures, and seminal vesicles were segmented in very few images  
229 displaying the structures. Other structures, such as the colon, the mesorectum, the small intestine,  
230 plastic clips, and the dissection plane during mesorectal excision, showed two significant fractions  
231 of images: one fraction without any prediction and one fraction with good to excellent performance  
232 metrics.

## 233 **DISCUSSION**

234 Correct recognition of visual cues is a key challenge in minimally-invasive surgery, as the majority  
235 of currently available laparoscopic and robotic instruments and devices do not provide any haptic  
236 feedback or additional imaging to visualize hidden structures. Consequently, the concept of  
237 enhancing surgeons' visual perception through computational techniques has attracted increasing  
238 scientific interest in the surgical community, mirrored by a growing body of research in the field of  
239 surgical data science.<sup>25</sup> The overwhelming majority of these studies, however, has investigated  
240 potential assistance tasks with limited clinical benefit, such as automated instrument  
241 classification.<sup>5,6</sup> Projects investigating the recognition of surgically meaningful structures in  
242 abdominal surgery are rare and mostly limited to laparoscopic cholecystectomy<sup>9,10</sup>, a far less  
243 complex surgical procedure performed in large numbers all over the world. The availability of a  
244 range of open-access datasets of cholecystectomy recordings<sup>6,11,26</sup> make this procedure an  
245 attractive example for proof-of-principle studies. Considering the example of RARR, we aimed to  
246 explore the possibility of an integration of image-based recognition for surgical guidance in  
247 complex oncological surgical procedures, for which no open-access video datasets are available.  
248 In summary, our findings suggest that even on the basis of limited annotated data, essential CNN-  
249 based temporal and spatial recognition tasks can be implemented in complex robot-assisted  
250 oncological procedures, providing the basis for context-dependent surgical guidance. State-of-  
251 the-art approaches using a ResNet50 paired with an LSTM satisfactorily differentiated five surgical  
252 phases at an average accuracy of 0.83 and F1 score of 0.78. Our results on image-based  
253 identification of anatomical structures and dissection planes are promising for selected target  
254 structures. Overall, however, they indicate that further methodological improvements and  
255 intensified interdisciplinary efforts are necessary for entirely convincing implementation of specific  
256 image recognition functions, in particular for tasks that require considerable specialized  
257 knowledge for annotation.

258 In general, the presented observations are in line with previous studies on visual analysis of  
259 laparoscopic images.<sup>27</sup> With regard to operative phase recognition, similar accuracies around 0.8  
260 have been reported for other laparoscopic procedures including cholecystectomy and  
261 sigmoidectomy.<sup>28</sup> Previous studies investigating the identification of anatomical structures have  
262 mostly focused on the classification of the presence of certain organs<sup>12</sup> or rough localization of the  
263 detected organs using bounding boxes<sup>29</sup>. We performed semantic segmentation of the exact  
264 boundaries of previously annotated structures and observed substantial variation of recognition  
265 quality, ranging from a mean IoU of < 0.1 for dissection lines and seminal vesicles to 0.82 for the  
266 abdominal wall during the lateral mobilization of the descending colon. It is conceivable that

267 unsuccessful recognition of some structures was a consequence of the limited amount of training  
268 data. For instance, seminal vesicles during mesorectal excision (mean IoU: 0.09) could, overall,  
269 not be segmented successfully, and input data was limited at 336 annotated images  
270 (Supplementary Table 2). In turn, four out of the five structures with the largest number of  
271 annotated images – the mesocolon (mean IoU: 0.71), Gerota's fascia (mean IoU: 0.78), the  
272 mesorectum (mean IoU: 0.48), and the dissection plane during mesorectal excision (mean IoU:  
273 0.32) – could be recognized in a significant proportion of images (Figure 4). Notably, several  
274 structures (including the colon, the small intestine, the mesorectum, and the dissection plane  
275 during mesorectal excision) were identified either at very high accuracy or not identified in the  
276 image at all, resulting in two large subsets of images at either end of the scale. Considering a  
277 video stream as a sequence of images, the successful recognition of a structure in a significant  
278 proportion of images may imply that even at this stage, the recognition algorithms may be clinically  
279 useful. The reported subjective clinical utility of a bounding box-based detection system  
280 recognizing the common bile duct and the cystic duct at average precisions of 0.32 and 0.07,  
281 respectively, supports this hypothesis<sup>29</sup> and encourages discussion about the clinical value of  
282 classical metrics quantifying segment overlap. Notably, explainability and real-world applicability  
283 of the classical metrics describing segment overlap have recently been explored in the context of  
284 autonomous driving, with similar findings on the limitations of these metrics.<sup>30</sup>  
285 Of note, the exact location of the dissection line could neither be successfully identified during  
286 medial mobilization of the descending colon nor during mesorectal excision. Two explanations are  
287 conceivable: First, thin and small structures displayed a trend towards being more challenging to  
288 predict. Another example for this observation is the largely unsuccessful segmentation of metal  
289 clips during vascular dissection. Second, the dissection lines show very diverse visual  
290 appearance. Especially during mesorectal excision, the appearance of embryonal tissue planes  
291 and the closely related dissection line at the mesorectal fascia can vary with regard to neoadjuvant  
292 (radio-)therapy and individual factors such as body composition, making identification particularly  
293 challenging.<sup>31</sup> Of note, this study included a variety of patients with rectal cancer, and no special  
294 patient factors were considered during selection of the video subsets for semantic segmentation  
295 for each individual phase (Table 1). An integration of more and diverse video data from multiple  
296 centers would likely improve recognition of the dissection lines and explore the limits of the applied  
297 state-of-the-art neural networks. In general, diversification of input data would be massively  
298 facilitated through publication of anonymized video data documenting complex surgical  
299 procedures.

300 For improved applicability, ongoing and future work will focus on two technical improvements: On  
301 the algorithmical level, recognition uncertainty will be implemented in display of the target structure  
302 segmentations, for instance through Bayesian computation methods.<sup>32</sup> Such methods facilitate a  
303 heatmap-like display of the image-based segmentations, which would visually approximate the  
304 ambiguity inherent to the distinction of adjacent and, in part, similar appearing anatomical  
305 structures. The integration of uncertainty estimation could also contribute to an increased  
306 acceptance of the system among clinicians. On the level of clinical implementation, the system  
307 needs to meet real-time requirements for clinical usability. This comprises the exact determination  
308 and subsequent minimization of the computation-associated delay to the range of tenths of a  
309 second. During the computation process for the presented study, the entire time required for image  
310 loading, computation of all outcome metrics and saving of the image ranged around four seconds.  
311 Moreover, a graphical user interface that allows for interaction of the surgeon with the guidance  
312 system (i.e. selecting target structures for display) will need to be integrated.

313 The limitations of this study are mostly related to limited data availability, which is generally one  
314 of the major bottlenecks for successful translation of AI-based methods in surgery. One of the key  
315 reasons for this is the high annotation effort required for an integration of clinically meaningful  
316 knowledge into a dataset.<sup>25</sup> The monocentric study design is another major limitation of this study,  
317 considerably restricting generalizability and transferability of the implemented functions. Future  
318 research will therefore aim at an integration of multicentric video data. In this context,  
319 standardization of (video) data recording and adaptability of the annotation process to differences  
320 in surgical techniques and approaches pose important challenges to consider during study design.  
321 Of note, the Society of American Gastrointestinal and Endoscopic Surgeons recently published  
322 recommendations for surgical video annotation to increase the amount of publicly available  
323 datasets and enable the creation of benchmark AI algorithms with a clinical impact.<sup>33</sup> The existing  
324 limitations notwithstanding, the presented dataset and study represent an important addition to  
325 the growing body of research on context-aware guidance in abdominal surgery, as it significantly  
326 expands the horizon of data science-assisted surgery to procedures of higher complexity and  
327 technical difficulty.

328 In conclusion, this study has established the principal components of a clinically applicable AI-  
329 based system for context-aware guidance in RARR. To our knowledge, this is the first approach  
330 to an implementation of machine learning-based guidance into a complex robot-assisted  
331 oncological procedure. A subsequent pilot study will merge the established functionalities into a  
332 basic guidance system and evaluate its clinical applicability, usability, and therapeutic impact on  
333 oncological and functional outcomes of RARR. Importantly, the basic concept of this system is

334 transferable to other complex minimally invasive surgical procedures with several critical phases  
335 such as minimally-invasive pancreatectomy or esophagectomy. With regard to the identified  
336 challenges in implementation of clinically relevant guidance functions, in particular limited data  
337 availability, our findings moreover encourage inter-institutional collaboration and improved data  
338 accessibility to stimulate research on a more diverse range of surgical procedures. The creation  
339 of more potent and impactful networks could ultimately result in a true clinical benefit for patients  
340 and healthcare professionals.

341 **REFERENCES**

- 342 1. Heald, R. J., Husband, E. M. & Ryall, R. D. H. The mesorectum in rectal cancer surgery—  
343 the clue to pelvic recurrence? *Br. J. Surg.* (1982) doi:10.1002/bjs.1800691019.
- 344 2. Chew, M. H., Yeh, Y. T., Lim, E. & Seow-Choen, F. Pelvic autonomic nerve preservation in  
345 radical rectal cancer surgery: Changes in the past 3 decades. *Gastroenterology Report*  
346 (2016) doi:10.1093/gastro/gow023.
- 347 3. Sturiale, A. *et al.* Long-term functional follow-up after anterior rectal resection for cancer.  
348 *Int. J. Colorectal Dis.* (2017) doi:10.1007/s00384-016-2659-6.
- 349 4. Jayne, D. *et al.* Effect of robotic-assisted vs conventional laparoscopic surgery on risk of  
350 conversion to open laparotomy among patients undergoing resection for rectal cancer the  
351 rolarr randomized clinical trial. *JAMA - J. Am. Med. Assoc.* **318**, 1569–1580 (2017).
- 352 5. Alsheakhali, M., Eslami, A., Roodaki, H. & Navab, N. CRF-Based Model for Instrument  
353 Detection and Pose Estimation in Retinal Microsurgery. *Comput. Math. Methods Med.*  
354 **2016**, (2016).
- 355 6. Jin, A. *et al.* Tool Detection and Operative Skill Assessment in Surgical Videos Using  
356 Region-Based Convolutional Neural Networks. *Proc. - 2018 IEEE Winter Conf. Appl.*  
357 *Comput. Vision, WACV 2018* **2018-January**, 691–699 (2018).
- 358 7. Burström, G. *et al.* Feasibility and accuracy of a robotic guidance system for navigated  
359 spine surgery in a hybrid operating room: a cadaver study. *Sci. Rep.* **10**, (2020).
- 360 8. Hu, Z. *et al.* First-in-human liver-tumour surgery guided by multispectral fluorescence  
361 imaging in the visible and near-infrared-I/II windows. *Nat. Biomed. Eng.* **4**, 259–271 (2020).
- 362 9. Madani, A. *et al.* Artificial Intelligence for Intraoperative Guidance. *Ann. Surg.* (2020)  
363 doi:10.1097/sla.0000000000004594.
- 364 10. Mascagni, P. *et al.* Artificial Intelligence for Surgical Safety: Automatic Assessment of the  
365 Critical View of Safety in Laparoscopic Cholecystectomy Using Deep Learning. *Ann. Surg.*  
366 (2020) doi:10.1097/SLA.0000000000004351.
- 367 11. Twinanda, A. P. *et al.* EndoNet: A Deep Architecture for Recognition Tasks on  
368 Laparoscopic Videos. *IEEE Trans. Med. Imaging* **36**, 86–97 (2016).
- 369 12. Leibetseder, A. *et al.* LapGyn4: A Dataset for 4 Automatic Content Analysis Problems in  
370 the Domain of Laparoscopic Gynecology. *Proc. 9th ACM Multimed. Syst. Conf.* **18**, (2018).
- 371 13. Ahmed, J., Kuzu, M. A., Figueiredo, N., Khan, J. & Parvaiz, A. Three-step standardized  
372 approach for complete mobilization of the splenic flexure during robotic rectal cancer  
373 surgery. *Color. Dis.* **18**, O171–O174 (2016).
- 374 14. Panteleimonitis, S. *et al.* Precision in robotic rectal surgery using the da Vinci Xi system

- 375 and integrated table motion, a technical note. *J. Robot. Surg.* **12**, 433–436 (2018).
- 376 15. Kikinis, R., Pieper, S. D. & Vosburgh, K. G. 3D Slicer: A Platform for Subject-Specific Image  
377 Analysis, Visualization, and Clinical Support. in *Intraoperative Imaging and Image-Guided*  
378 *Therapy* 277–289 (Springer New York, 2014). doi:10.1007/978-1-4614-7657-3\_19.
- 379 16. Hochreiter, S. & Schmidhuber, J. Long Short-Term Memory. *Neural Comput.* **9**, 1735–1780  
380 (1997).
- 381 17. He, K., Zhang, X., Ren, S. & Sun, J. Deep Residual Learning for Image Recognition. *Proc.*  
382 *IEEE Comput. Soc. Conf. Comput. Vis. Pattern Recognit.* **2016-December**, 770–778  
383 (2015).
- 384 18. Deng, J. *et al.* ImageNet: A large-scale hierarchical image database. 248–255 (2010)  
385 doi:10.1109/CVPR.2009.5206848.
- 386 19. Wu, Y., Kirillov, A., Lo, F. W.-Y. & Girshick, R. Detectron2.  
387 <https://github.com/facebookresearch/detectron2> (2019).
- 388 20. Leger, S. *et al.* A comparative study of machine learning methods for time-To-event survival  
389 data for radiomics risk modelling. *Sci. Rep.* **7**, 11 (2017).
- 390 21. Czempiel, T. *et al.* TeCNO: Surgical Phase Recognition with Multi-Stage Temporal  
391 Convolutional Networks.
- 392 22. Funke, I. *et al.* Temporal coherence-based self-supervised learning for laparoscopic  
393 workflow analysis. *Lect. Notes Comput. Sci. (including Subser. Lect. Notes Artif. Intell. Lect.*  
394 *Notes Bioinformatics)* **11041 LNCS**, 85–93 (2018).
- 395 23. Goroshin, R., Bruna, J., Tompson, J., Eigen, D. & LeCun, Y. Unsupervised Learning of  
396 Spatiotemporally Coherent Metrics. *Proc. IEEE Int. Conf. Comput. Vis.* **2015 Inter**, 4086–  
397 4093 (2015).
- 398 24. Jayaraman, D. & Grauman, K. Slow and steady feature analysis: higher order temporal  
399 coherence in video. *Proc. IEEE Comput. Soc. Conf. Comput. Vis. Pattern Recognit.* **2016-**  
400 **December**, 3852–3861 (2015).
- 401 25. Maier-Hein, L. *et al.* Surgical data science for next-generation interventions. *Nature*  
402 *Biomedical Engineering* (2017) doi:10.1038/s41551-017-0132-7.
- 403 26. Hong, W.-Y. *et al.* CholecSeg8k: A Semantic Segmentation Dataset for Laparoscopic  
404 Cholecystectomy Based on Cholec80. (2020).
- 405 27. Anteby, R. *et al.* Deep learning visual analysis in laparoscopic surgery: a systematic review  
406 and diagnostic test accuracy meta-analysis. *Surg. Endosc.* **35**, 1521–1533 (2021).
- 407 28. Garrow, C. R. *et al.* Machine Learning for Surgical Phase Recognition: A Systematic  
408 Review. *Ann. Surg.* **273**, 684–693 (2021).



- 409 29. Tokuyasu, T. *et al.* Development of an artificial intelligence system using deep learning to  
410 indicate anatomical landmarks during laparoscopic cholecystectomy. *Surg. Endosc.* 2020  
411 354 **35**, 1651–1658 (2020).
- 412 30. Zhang, Y., Mehta, S. & Caspi, A. Rethinking Semantic Segmentation Evaluation for  
413 Explainability and Model Selection. (2021).
- 414 31. Ward, T. M. *et al.* Challenges in surgical video annotation. *Comput. Assist. Surg.* **26**, 58–  
415 68 (2021).
- 416 32. Kwon, Y., Won, J. H., Kim, B. J. & Paik, M. C. Uncertainty quantification using Bayesian  
417 neural networks in classification: Application to biomedical image segmentation. *Comput.*  
418 *Stat. Data Anal.* **142**, 106816 (2020).
- 419 33. Meireles, O. R. *et al.* SAGES consensus recommendations on an annotation framework for  
420 surgical video. *Surg. Endosc.* 2021 **1**, 1–12 (2021).
- 421 34. Paszke, A. *et al.* PyTorch: An Imperative Style, High-Performance Deep Learning Library.  
422 (2019).  
423



424 **TABLES**

425 **Table 1**

426 **Tab. 1 Patient characteristics.** For age, BMI and surgery duration, mean  $\pm$  SD are displayed. All  
427 other data are presented as total numbers and percentages of the (sub-)cohort. Abbreviations:  
428 Abdominoperineal resection (APR), Anterior Resection (AR), Body Mass Index (BMI), Colorectal  
429 cancer (CRC), Low anterior resection (LAR), Intersphincteric resection (ISR), Partial mesorectal  
430 excision (PME), Total mesorectal excision (TME).

431

432

|                                              | <b>Total</b><br>(n = 57) | <b>Temporal<br/>annotation</b><br>(n = 33) | <b>Vascular<br/>Dissection</b><br>(n = 10) | <b>Medial<br/>Mobilization</b><br>(n = 11) | <b>Lateral<br/>Mobilization</b><br>(n = 10) | <b>Mesorectal<br/>Excision</b><br>(n = 10) |
|----------------------------------------------|--------------------------|--------------------------------------------|--------------------------------------------|--------------------------------------------|---------------------------------------------|--------------------------------------------|
| <b>Age [years]</b>                           | 62.4 ± 11.2              | 62.2 ± 10.2                                | 62.1 ± 5.2                                 | 65.6 ± 7.7                                 | 63.9 ± 5.0                                  | 62.8 ± 8.1                                 |
| <b>BMI [kg/m<sup>2</sup>]</b>                | 26.5 ± 3.3               | 26.7 ± 2.9                                 | 26.1 ± 2.1                                 | 26.7 ± 2.9                                 | 26.6 ± 2.8                                  | 26.9 ± 2.0                                 |
| <b>Surgery duration [min]</b>                | 414 ± 112                | 415 ± 117                                  | 444 ± 148                                  | 410 ± 98                                   | 466 ± 141                                   | 377 ± 130                                  |
| <b>Sex</b>                                   |                          |                                            |                                            |                                            |                                             |                                            |
| Female                                       | 14 (24.6)                | 5 (15.2)                                   | 1 (10.0)                                   | 2 (18.2)                                   | 1 (10.0)                                    | 1 (10.0)                                   |
| Male                                         | 43 (75.4)                | 28 (84.8)                                  | 9 (90.0)                                   | 9 (81.8)                                   | 9 (90.0)                                    | 9 (90.0)                                   |
| <b>Indication</b>                            |                          |                                            |                                            |                                            |                                             |                                            |
| CRC                                          | 54 (94.7)                | 31 (93.9)                                  | 10 (100.0)                                 | 11 (100.0)                                 | 10 (100.0)                                  | 10 (100.0)                                 |
| Other                                        | 3 (5.3)                  | 2 (6.1)                                    | 0                                          | 0                                          | 0                                           | 0                                          |
| <b>Distance from anocutaneous line</b>       |                          |                                            |                                            |                                            |                                             |                                            |
| <6 cm                                        | 19 (33.3)                | 14 (42.4)                                  | 3 (30.0)                                   | 3 (27.3)                                   | 3 (30.0)                                    | 5 (50.0)                                   |
| 6 - <12 cm                                   | 26 (45.6)                | 14 (42.4)                                  | 4 (40.0)                                   | 5 (45.5)                                   | 5 (50.0)                                    | 3 (30.0)                                   |
| ≥12 cm                                       | 12 (21.1)                | 5 (15.2)                                   | 3 (30.0)                                   | 3 (27.3)                                   | 2 (20.0)                                    | 2 (20.0)                                   |
| <b>Tumor stenosis</b>                        |                          |                                            |                                            |                                            |                                             |                                            |
| Yes                                          | 23 (40.4)                | 11 (33.3)                                  | 4 (40.0)                                   | 5 (45.5)                                   | 3 (30.0)                                    | 4 (40.0)                                   |
| No                                           | 34 (59.6)                | 22 (66.7)                                  | 6 (60.0)                                   | 6 (54.5)                                   | 7 (70.0)                                    | 6 (60.0)                                   |
| <b>Neoadjuvant irradiation</b>               |                          |                                            |                                            |                                            |                                             |                                            |
| Yes                                          | 25 (43.9)                | 16 (48.5)                                  | 4 (40.0)                                   | 4 (36.4)                                   | 4 (40.0)                                    | 4 (40.0)                                   |
| No                                           | 32 (56.1)                | 17 (51.5)                                  | 6 (60.0)                                   | 7 (63.6)                                   | 6 (60.0)                                    | 6 (60.0)                                   |
| <b>Previous intraabdominal surgery</b>       |                          |                                            |                                            |                                            |                                             |                                            |
| Yes                                          | 20 (35.1)                | 10 (30.3)                                  | 1 (10.0)                                   | 0                                          | 1 (10.0)                                    | 3 (30.0)                                   |
| No                                           | 37 (64.9)                | 23 (69.7)                                  | 9 (90.0)                                   | 11 (100.0)                                 | 9 (90.0)                                    | 7 (70.0)                                   |
| <b>Surgical resection technique</b>          |                          |                                            |                                            |                                            |                                             |                                            |
| LAR, TME                                     | 33 (57.9)                | 18 (54.5)                                  | 4 (40.0)                                   | 7 (63.6)                                   | 6 (60.0)                                    | 4 (40.0)                                   |
| ISR, TME                                     | 9 (15.8)                 | 5 (15.2)                                   | 1 (10.0)                                   | 0                                          | 1 (10.0)                                    | 2 (20.0)                                   |
| APR, TME                                     | 6 (10.5)                 | 4 (12.1)                                   | 1 (10.0)                                   | 0                                          | 0                                           | 2 (20.0)                                   |
| AR, PME                                      | 9 (15.8)                 | 6 (18.2)                                   | 4 (40.0)                                   | 4 (36.4)                                   | 3 (30.0)                                    | 2 (20.0)                                   |
| <b>T status (for rectal cancers, n = 54)</b> |                          |                                            |                                            |                                            |                                             |                                            |
| pT0                                          | 4 (7.4)                  | 2 (6.5)                                    | 0                                          | 1 (9.1)                                    | 0                                           | 2 (20.0)                                   |
| pTis                                         | 1 (1.9)                  | 0                                          | 0                                          | 0                                          | 0                                           | 0                                          |
| pT1                                          | 8 (14.8)                 | 4 (12.9)                                   | 3 (30.0)                                   | 2 (18.2)                                   | 3 (30.0)                                    | 3 (30.0)                                   |
| pT2                                          | 14 (25.9)                | 9 (29.0)                                   | 2 (20.0)                                   | 1 (9.1)                                    | 2 (20.0)                                    | 3 (30.0)                                   |
| pT3a                                         | 15 (27.8)                | 10 (32.3)                                  | 3 (30.0)                                   | 6 (54.5)                                   | 3 (30.0)                                    | 1 (10.0)                                   |
| pT3b                                         | 12 (22.2)                | 6 (19.4)                                   | 2 (20.0)                                   | 1 (9.1)                                    | 2 (20.0)                                    | 1 (10.0)                                   |
| <b>N status (for rectal cancers, n = 54)</b> |                          |                                            |                                            |                                            |                                             |                                            |
| pN0                                          | 32 (59.3)                | 14 (45.2)                                  | 4 (40.0)                                   | 4 (36.4)                                   | 4 (40.0)                                    | 5 (50.0)                                   |
| pN1                                          | 14 (25.9)                | 10 (32.3)                                  | 5 (50.0)                                   | 3 (27.3)                                   | 5 (50.0)                                    | 3 (30.0)                                   |
| pN2a                                         | 5 (9.3)                  | 4 (12.9)                                   | 1 (10.0)                                   | 2 (18.2)                                   | 0                                           | 1 (10.0)                                   |
| pN2b                                         | 3 (5.6)                  | 3 (9.7)                                    | 0                                          | 2 (18.2)                                   | 1 (10.0)                                    | 1 (10.0)                                   |

434

435 **Table 2**

436 **Tab. 2 Summary of performance metrics for recognition of surgical phases using a**  
 437 **ResNet50 alone and in combination with an LSTM network.** For each metric, mean and  
 438 standard deviation are displayed.

439

| Model           | No pre-training |             | Self-supervised pre-training |             |
|-----------------|-----------------|-------------|------------------------------|-------------|
|                 | F1              | Accuracy    | F1                           | Accuracy    |
| ResNet50        | 0.68 ± 0.01     | 0.74 ± 0.02 | 0.68 ± 0.01                  | 0.74 ± 0.02 |
| ResNet50 + LSTM | 0.79 ± 0.02     | 0.82 ± 0.01 | 0.78 ± 0.01                  | 0.83 ± 0.02 |

440

441

442

443 **Table 3**

444 **Tab. 3 Summary of performance metrics for phase-specific semantic segmentation of**  
 445 **(anatomical) structures and dissection planes.** For each metric, mean and standard deviation  
 446 are displayed. Abbreviations: Intersection over union (IoU), Lateral mobilization (LM), Medial  
 447 mobilization (MM), Mesorectal excision (ME), Vascular dissection (VD).

448

| Phase | Target structure           | F1          | IoU         | Precision   | Recall      | Specificity |
|-------|----------------------------|-------------|-------------|-------------|-------------|-------------|
| VD    | Inferior mesenteric artery | 0.18 ± 0.11 | 0.16 ± 0.09 | 0.20 ± 0.12 | 0.20 ± 0.12 | 0.23 ± 0.14 |
|       | Inferior mesenteric vein   | 0.27 ± 0.19 | 0.25 ± 0.17 | 0.29 ± 0.19 | 0.29 ± 0.19 | 0.32 ± 0.21 |
|       | Plastic clip               | 0.59 ± 0.22 | 0.55 ± 0.21 | 0.60 ± 0.22 | 0.61 ± 0.22 | 0.64 ± 0.24 |
|       | Metal clip                 | 0.20 ± 0.10 | 0.17 ± 0.08 | 0.23 ± 0.10 | 0.23 ± 0.10 | 0.26 ± 0.14 |
| MM    | Gerota's fascia            | 0.78 ± 0.05 | 0.74 ± 0.03 | 0.80 ± 0.05 | 0.81 ± 0.05 | 0.83 ± 0.06 |
|       | Mesocolon                  | 0.71 ± 0.07 | 0.65 ± 0.05 | 0.73 ± 0.07 | 0.74 ± 0.07 | 0.77 ± 0.09 |
|       | Dissection line (MM)       | 0.05 ± 0.02 | 0.04 ± 0.01 | 0.06 ± 0.02 | 0.06 ± 0.03 | 0.10 ± 0.08 |
|       | Exploration area           | 0.16 ± 0.07 | 0.14 ± 0.05 | 0.18 ± 0.07 | 0.19 ± 0.08 | 0.23 ± 0.12 |
| LM    | Abdominal wall             | 0.82 ± 0.06 | 0.78 ± 0.04 | 0.84 ± 0.06 | 0.85 ± 0.05 | 0.87 ± 0.06 |
|       | Adhesion                   | 0.09 ± 0.07 | 0.08 ± 0.06 | 0.11 ± 0.09 | 0.11 ± 0.08 | 0.13 ± 0.11 |
|       | Colon                      | 0.49 ± 0.10 | 0.46 ± 0.09 | 0.51 ± 0.11 | 0.51 ± 0.11 | 0.54 ± 0.12 |
|       | Fat                        | 0.68 ± 0.11 | 0.64 ± 0.10 | 0.71 ± 0.12 | 0.71 ± 0.12 | 0.73 ± 0.12 |
|       | Small intestine            | 0.35 ± 0.25 | 0.33 ± 0.24 | 0.36 ± 0.25 | 0.36 ± 0.25 | 0.37 ± 0.26 |
| ME    | Mesorectum                 | 0.48 ± 0.10 | 0.45 ± 0.08 | 0.50 ± 0.10 | 0.50 ± 0.10 | 0.53 ± 0.12 |
|       | Dissection plane (ME)      | 0.32 ± 0.09 | 0.28 ± 0.08 | 0.34 ± 0.10 | 0.35 ± 0.10 | 0.39 ± 0.12 |
|       | Dissection line (ME)       | 0.05 ± 0.02 | 0.04 ± 0.02 | 0.08 ± 0.03 | 0.06 ± 0.03 | 0.12 ± 0.12 |
|       | Seminal vesicles           | 0.09 ± 0.10 | 0.08 ± 0.09 | 0.10 ± 0.10 | 0.10 ± 0.10 | 0.11 ± 0.12 |

449

450

451 **FIGURE CAPTIONS**

452 **Figure 1**

453 **Fig. 1 Annotated surgical phases and phase-specifically segmented target structures.**

454

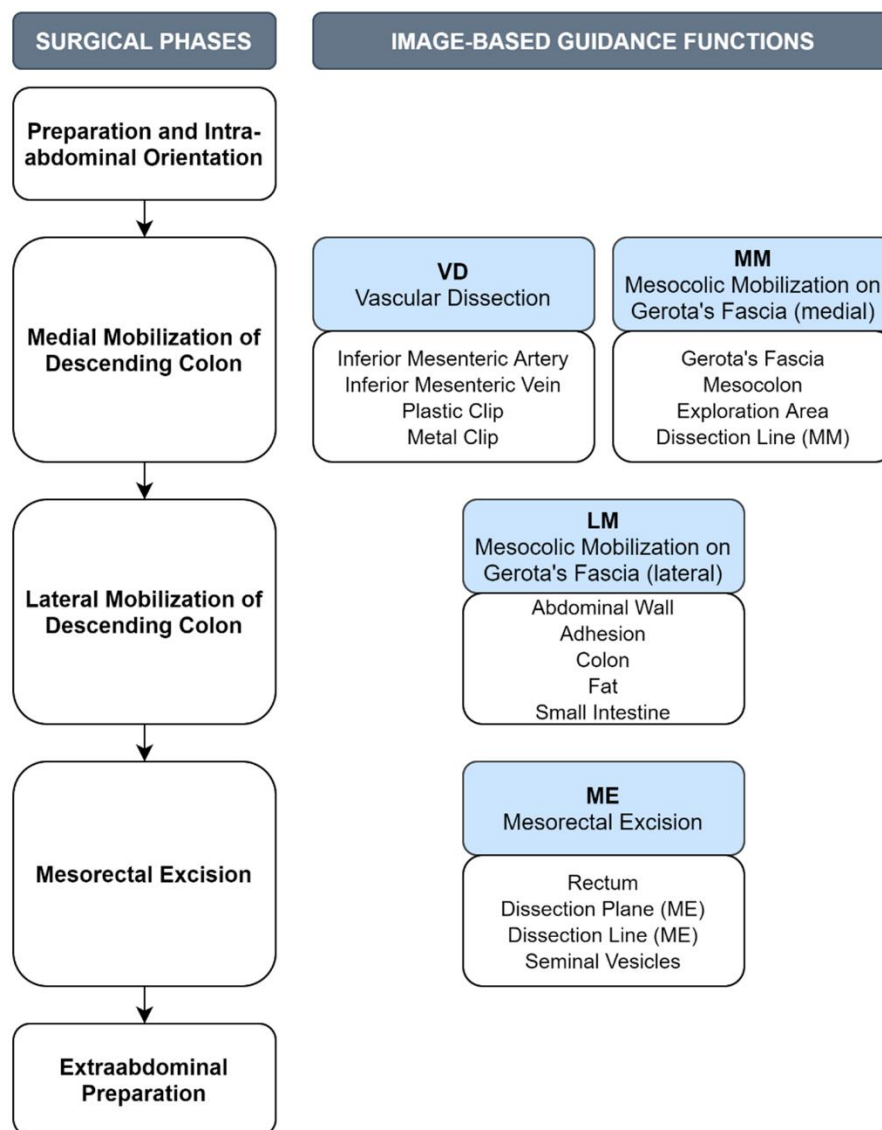

455

456 **Figure 2**

457 **Fig. 2 Schematic illustration of the networks used for phase identification (A) and semantic**  
458 **segmentation (B).** (A) A neural network consisting of a ResNet50 backbone with or without an  
459 LSTM was used for temporal prediction of surgical phases. Non-annotated videos were used for  
460 self-supervised pre-training of the algorithms. The model was validated using 4-fold cross

461 validation. **(B)** For spatial segmentation, a neural network based on a ResNet and a feature  
462 pyramid network as backbone was used. The network was pre-trained on the ImageNet dataset  
463 and validated using leave-one-out cross validation.

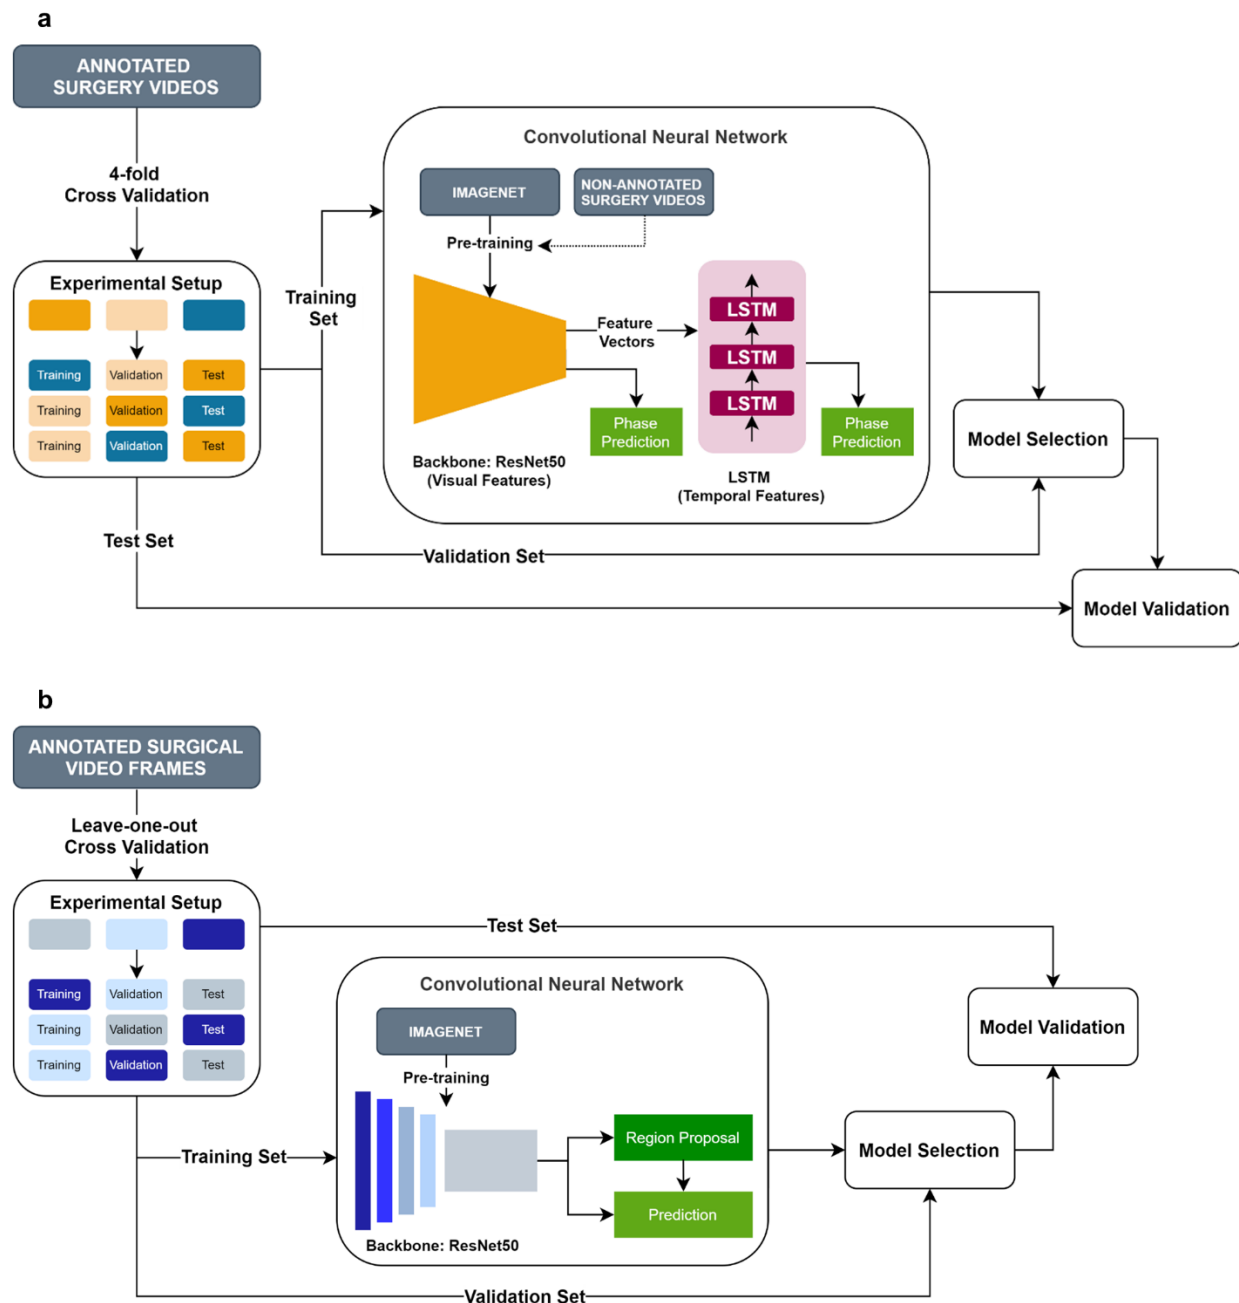

464

465 **Figure 3**

466 **Fig. 3 Phase-specific annotation and model outputs for recognition of anatomical**  
467 **structures and dissection planes. Vascular Dissection (VD):** Inferior mesenteric artery (red),  
468 plastic clip (green), and metal clip (orange) are displayed. **Medial mobilization (MM):** Mesocolon

469 (light green), Gerota's fascia (light pink), dissection line (yellow), and exploration area (pink) are  
470 displayed. **Lateral mobilization (LM):** Abdominal wall (red), colon (light pink), fat (yellow), and  
471 adhesions (blue) are displayed. **Mesorectal excision (ME):** Mesorectum (light brown), dissection  
472 plane (green), and dissection line (red) are displayed.

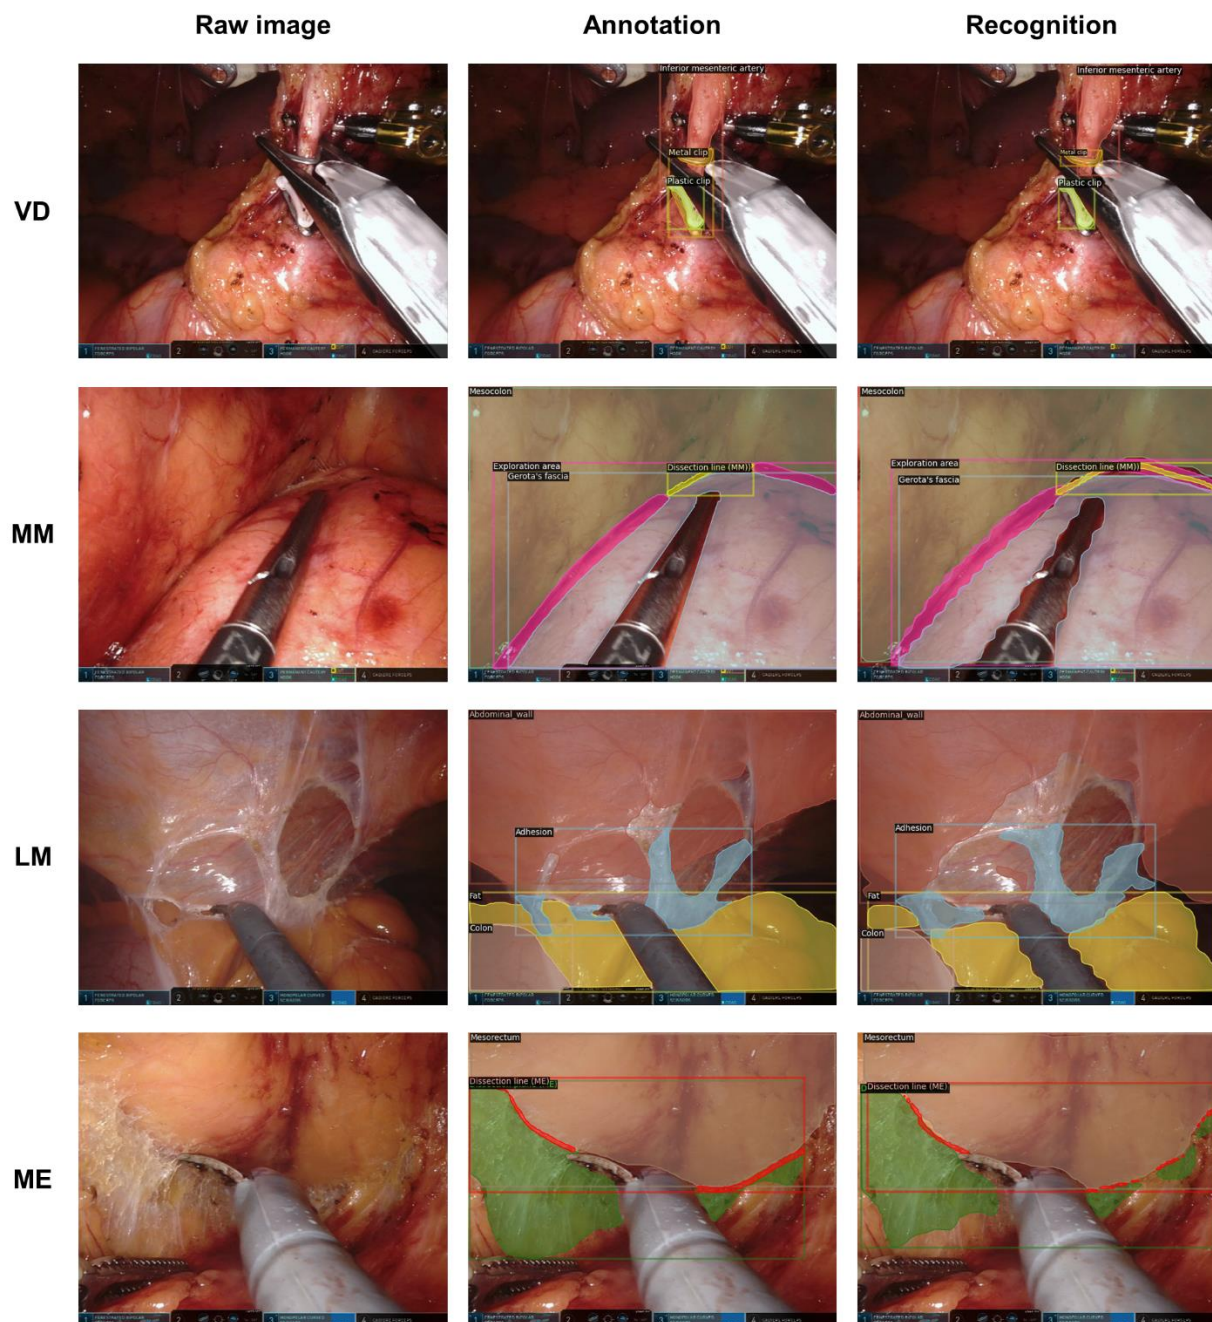

473



474 **Figure 4**

475 **Fig. 4 Violin plot illustrations of the performance metrics for model outputs for phase-**  
476 **specific segmentation of anatomical structures and dissection planes.** The median and  
477 quartiles are illustrated as solid and dashed lines, respectively. Abbreviations: Intersection over  
478 union (IoU), Lateral mobilization (LM), Medial mobilization (MM), Mesorectal excision (ME),  
479 Vascular dissection (VD).

480

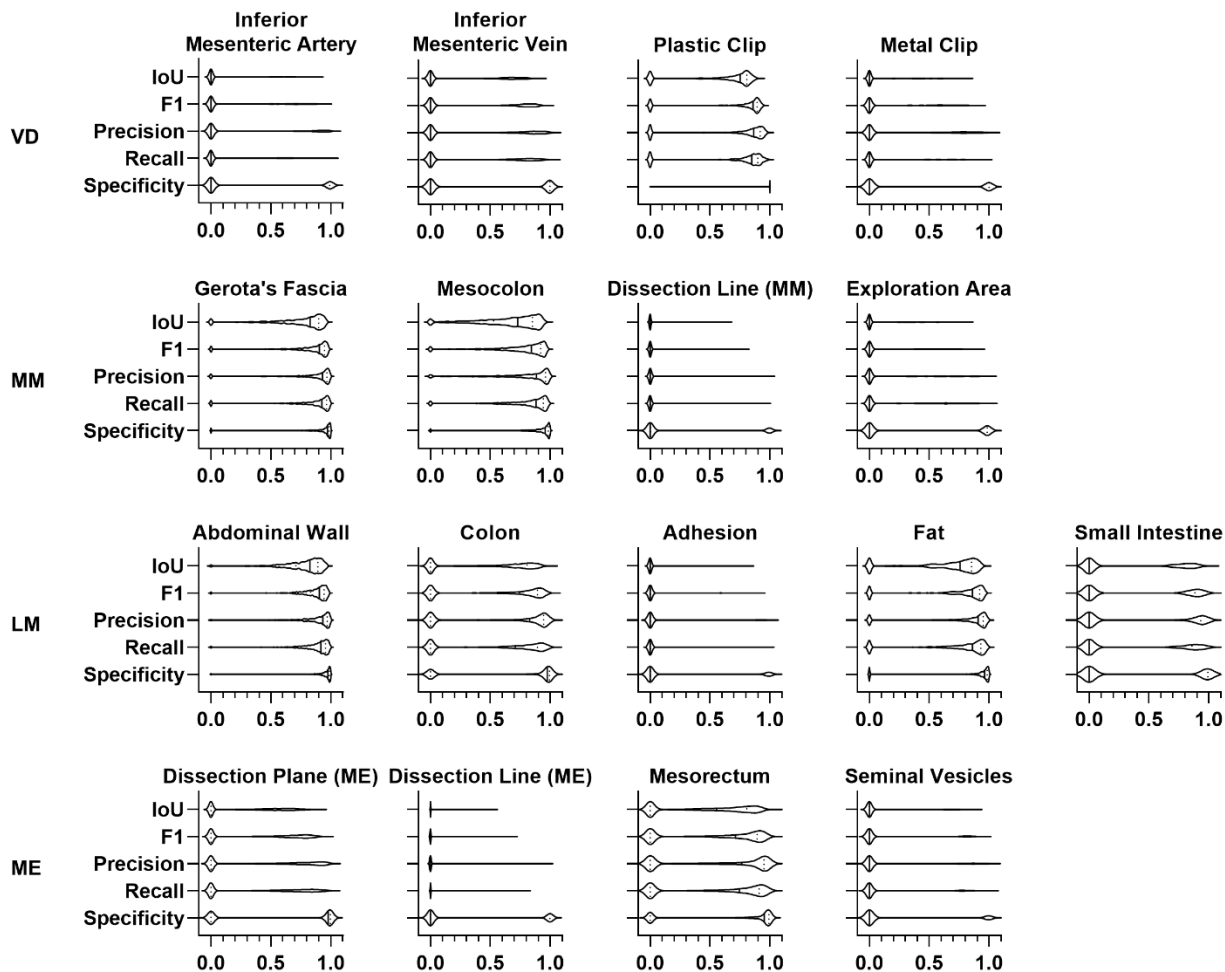

481

482 **ABBREVIATIONS**

|     |     |                              |
|-----|-----|------------------------------|
| 483 | AI  | Artificial Intelligence      |
| 484 | AUC | Area under the curve         |
| 485 | CNN | Convolutional neural network |
| 486 | F1  | F1 score                     |
| 487 | IoU | Intersection over union      |
| 488 | LM  | Lateral mobilization (phase) |
| 489 | ME  | Mesorectal excision (phase)  |
| 490 | MM  | Medial mobilization (phase)  |
| 491 | PME | Partial mesorectal excision  |
| 492 | SD  | Standard deviation           |
| 493 | TME | Total mesorectal excision    |
| 494 | VD  | Vascular dissection (phase)  |
| 495 |     |                              |



## 496 **ACKNOWLEDGEMENTS AND FUNDING**

497 FRK, SL, JW, and SS were supported through project funding within the Else Kröner Fresenius  
498 Center for Digital Health (EKFZ), Dresden, Germany (project “CoBot”). FRK received funding from  
499 the Medical Faculty of the Technical University Dresden within the MedDrive Start program (grant  
500 number 60487). FMR received a doctoral student scholarship from the *Carus Promotionskolleg*  
501 Dresden.

502

## 503 **AUTHOR CONTRIBUTIONS**

504 FRK, SL, JW, MD, and SS conceptualized the study. FRK, MC, FMR, and TN collected and  
505 annotated clinical and video data and contributed to data analysis. SL, SK, AC, and SB  
506 implemented and trained the neural networks and contributed to data analysis. TW and JK gave  
507 substantial clinical input. JW, MD, JF, and SS supervised the project, provided infrastructure and  
508 gave important scientific input. FRK drafted the initial manuscript text. All authors reviewed, edited,  
509 and approved the final manuscript.

510

## 511 **COMPETING INTERESTS**

512 The authors declare no conflicts of interest.

513

## 514 **DATA AVAILABILITY**

515 The datasets generated and analysed during the current study are available from the  
516 corresponding author (Prof. Stefanie Speidel, [stefanie.speidel@nct-dresden.de](mailto:stefanie.speidel@nct-dresden.de)) on reasonable  
517 request. To gain access, data requestors will need to sign a data access agreement.

518

## 519 **CODE AVAILABILITY**

520 The developed framework in this current study based on the Detectron2 model<sup>19</sup> using the  
521 PyTorch library<sup>34</sup>. The source code for surgical phase recognition and the source code for image  
522 segmentation are publicly available: [https://gitlab.com/nct\\_tso\\_public/cobot\\_phase\\_recognition](https://gitlab.com/nct_tso_public/cobot_phase_recognition)  
523 (phase recognition) and [https://gitlab.com/nct\\_tso\\_public/cobot\\_segmentation](https://gitlab.com/nct_tso_public/cobot_segmentation) (segmentation).

524
